# Supplementary material for: Targeting metzincins to mitigate jellyfish blooms: a novel approach for conservation
Source: Frontiers journal article supplement (doi:10.3389/fmars.2025.1563258), 2025-04-15
Supplement: Table_1.xlsx [file Table_1.xlsx]

## Sheet: Figure4 F-I
	Test	Average	Reference	Average	Ct1-Ct2	Ct3-Ct4	Average	△Ct	Folds	Average
C-CTG-27.26	23.72	22.4538	18.43	18.1775		5.5425	4.27625		1.05639	1	1.03301
	22.67		18.43			4.4925			1.00963
	21.37		17.67			3.1925			0.951734		0.965095
	21.97		17.64			3.7925			0.978456
	23.03		18.52			4.8525			1.02566		1.01876
	22.72		18.3			4.5425			1.01186
	21.81		18.29			3.6325			0.97133		0.983132
	22.34		18.14			4.1625			0.994934
E-CTG-27.26	23.98	23.7129	17.67	18.1075	5.8725			1.59625	0.330736	0.432996	0.247481
	24.99		17.64		6.8825			2.60625	0.164225
	23.89		18.37		5.7825			1.50625	0.352025		0.352025
			18.47
	23.15		18.41		5.0425			0.76625	0.587944		0.531102
	23.46		18.05		5.3525			1.07625	0.47426
	22.91		18.09		4.8025			0.52625	0.694357		0.560892
	23.61		18.16		5.5025			1.22625	0.427427
	Test	Average	Reference	Average	Ct1-Ct2	Ct3-Ct4	Average	△Ct	Folds	Average
C-CTG-116.73	23.91	23.795	18.43	18.1775		5.7325	5.6175		1.00483	1	1.00609
	23.97		18.43			5.7925			1.00735
	23.57		17.67			5.3925			0.990544		0.995167
	23.79		17.64			5.6125			0.99979
	24.25		18.52			6.0725			1.01912		1.02143
	24.36		18.3			6.1825			1.02374
	23.3		18.29			5.1225			0.979197		0.977306
	23.21		18.14			5.0325			0.975415
E-CTG-116.73	24.95	24.6825	17.67	18.1075	6.8425			1.225	0.427798	0.517761	0.456221
	24.77		17.64		6.6625			1.045	0.484645
	24.72		18.37		6.6125			0.995	0.501736		0.494876
	24.76		18.47		6.6525			1.035	0.488016
	24.58		18.41		6.4725			0.855	0.552865		0.530803
	24.7		18.05		6.5925			0.975	0.50874
	24.56		18.09		6.4525			0.835	0.560583		0.589146
	24.42		18.16		6.3125			0.695	0.617709
	Test	Average	Reference	Average	Ct1-Ct2	Ct3-Ct4	Average	△Ct	Folds	Average
C-CTG-132.73	24.3	24.0125	18.43	18.1775		6.1225	5.835		1.01197	1	1.0126
	24.33		18.43			6.1525			1.01322
	23.09		17.67			4.9125			0.961583		0.958251
	22.93		17.64			4.7525			0.954919
	24.71		18.52			6.5325			1.02905		1.02572
	24.55		18.3			6.3725			1.02238
	24.06		18.29			5.8825			1.00198		1.00344
	24.13		18.14			5.9525			1.00489
E-CTG-132.73	24.25	24.47	17.67	18.1075	6.1425			0.3075	0.808041	0.698403	0.808041
			17.64
	24.42		18.37		6.3125			0.4775	0.718221		0.673909
	24.61		18.47		6.5025			0.6675	0.629597
	24.71		18.41		6.6025			0.7675	0.587435		0.587435
			18.05
	24.36		18.09		6.2525			0.4175	0.748721		0.748721
			18.16
	Test	Average	Reference	Average	Ct1-Ct2	Ct3-Ct4	Average	△Ct	Folds	Average
C-CTG-18.548	22.99	22.9813	18.43	18.1775		4.8125	4.80375		1.00038	1	0.987544
	22.4		18.43			4.2225			0.974708
	22.73		17.67			4.5525			0.989067		0.988414
	22.7		17.64			4.5225			0.987762
	24.33		18.52			6.1525			1.05869		1.03976
	23.46		18.3			5.2825			1.02083
	22.6		18.29			4.4225			0.98341		0.984281
	22.64		18.14			4.4625			0.985151
E-CTG-18.548	24.8	24.185	17.67	18.1075	6.6925			1.88875	0.270041	0.429332	0.263646
	24.87		17.64		6.7625			1.95875	0.257251
	24.18		18.37		6.0725			1.26875	0.415019		0.420853
	24.14		18.47		6.0325			1.22875	0.426687
	23.96		18.41		5.8525			1.04875	0.483387		0.473541
	24.02		18.05		5.9125			1.10875	0.463696
	23.63		18.09		5.5225			0.71875	0.607624		0.559286
	23.88		18.16		5.7725			0.96875	0.510949

## Sheet: Figure4 O
	Test	Average	Reference	Average	Ct1-Ct2	Ct3-Ct4	Average	△Ct	Folds	Average
C NOTCH1	21.75	20.56	16.05	16.4075		5.3425	4.1525		1.05788	1	1.02067
	20.22		16.01			3.8125			0.983463
	20.3		16.49			3.8925			0.987354		0.983706
	20.15		16.77			3.7425			0.980058
	20.44		16.67			4.0325			0.994163		0.987597
	20.17		16.75			3.7625			0.981031
	20.61		16.41			4.2025			1.00243		1.00803
	20.84		16.11			4.4325			1.01362
E NOTCH1	20.63	20.45	16.43	16.72	3.91			-0.2425	1.18304	1.35216	1.18304
	20.63		16.54		3.91			-0.2425	1.18304
	20.48		16.52		3.76			-0.3925	1.31267		1.27297
	20.57		17.03		3.85			-0.3025	1.23328
	20.46		16.85		3.74			-0.4125	1.33099		1.30832
	20.51		16.88		3.79			-0.3625	1.28565
	20.28		16.77		3.56			-0.5925	1.50786		1.64431
	20.04		16.74		3.32			-0.8325	1.78077
	Test	Average	Reference	Average	Ct1-Ct2	Ct3-Ct4	Average	△Ct	Folds	Average
C APH1	21.3	21.1087	16.05	16.4075		4.8925	4.70125		1.00906	1	1.00717
	21.22		16.01			4.8125			1.00527
	20.98		16.49			4.5725			0.993901		0.995559
	21.05		16.77			4.6425			0.997217
	21.16		16.67			4.7525			1.00243		0.998875
	21.01		16.75			4.6025			0.995322
	21.11		16.41			4.7025			1.00006		0.998401
	21.04		16.11			4.6325			0.996743
E APH1	20.24	20.8075	16.43	16.72	3.52			-1.18125	2.26773	1.58861	2.36608
	20.12		16.54		3.4			-1.30125	2.46442
	21.08		16.52		4.36			-0.34125	1.26685		1.26685
	21.08		17.03		4.36			-0.34125	1.26685
	21.25		16.85		4.53			-0.17125	1.12603		1.26099
	20.94		16.88		4.22			-0.48125	1.39595
	20.9		16.77		4.18			-0.52125	1.4352		1.4605
	20.85		16.74		4.13			-0.57125	1.48581
	Test	Average	Reference	Average	Ct1-Ct2	Ct3-Ct4	Average	△Ct	Folds	Average
C EP300	20.36	20.3188	16.05	16.4075		3.9525	3.91125		1.00203	1	1.00843
	20.62		16.01			4.2125			1.01483
	19.74		16.49			3.3325			0.971516		0.980129
	20.09		16.77			3.6825			0.988742
	20.29		16.67			3.8825			0.998585		0.997109
	20.23		16.75			3.8225			0.995632
	20.58		16.41			4.1725			1.01286		1.01433
	20.64		16.11			4.2325			1.01581
E EP300	20.03	19.9825	16.43	16.72	3.31			-0.60125	1.51703	1.60062	1.52762
	20.01		16.54		3.29			-0.62125	1.53821
	19.38		16.52		2.66			-1.25125	2.38048		1.75325
	20.46		17.03		3.74			-0.17125	1.12603
	20.15		16.85		3.43			-0.48125	1.39595		1.43575
	20.07		16.88		3.35			-0.56125	1.47555
	19.8		16.77		3.08			-0.83125	1.77923		1.68584
	19.96		16.74		3.24			-0.67125	1.59245
	Test	Average	Reference	Average	Ct1-Ct2	Ct3-Ct4	Average	△Ct	Folds	Average
C ADAM10	21.69	21.46	16.05	16.4075		5.2825	5.0525		1.01072	1	1.00746
	21.55		16.01			5.1425			1.00419
	21.33		16.49			4.9225			0.993942		0.99301
	21.29		16.77			4.8825			0.992078
	21.36		16.67			4.9525			0.99534		0.993709
	21.29		16.75			4.8825			0.992078
	21.44		16.41			5.0325			0.999068		1.00582
	21.73		16.11			5.3225			1.01258
E ADAM10	20.15	20.0212	16.43	16.72	3.43			-0.48125	1.39595	1.54141	1.3583
	20.23		16.54		3.51			-0.40125	1.32065
	20.11		16.52		3.39			-0.52125	1.4352		1.6134
	19.79		17.03		3.07			-0.84125	1.7916
	20.03		16.85		3.31			-0.60125	1.51703		1.77335
	19.61		16.88		2.89			-1.02125	2.02968
	20.15		16.77		3.43			-0.48125	1.39595		1.42057
	20.1		16.74		3.38			-0.53125	1.44518

## Sheet: Figure4 P
	Test	Average	Reference	Average	Ct1-Ct2	Ct3-Ct4	Average	△Ct	Folds	Average
C AGRN	21.31	21.3212	16.08	16.5475		4.7625	4.77375		0.999472	1	0.99572
	21.15		16.67			4.6025			0.991968
	21.22		16.77			4.6725			0.995251		1.00158
	21.49		16.06			4.9425			1.00791
	20.87		16.7			4.3225			0.978836		0.98165
	20.99		16.82			4.4425			0.984464
	21.64		16.86			5.0925			1.01495		1.02105
	21.9		16.42			5.3525			1.02714
E AGRN	20.35	20.8575	16.73	16.73	3.62			-1.15375	2.22491	1.60664	1.91006
	20.83		16.99		4.1			-0.67375	1.59521
	20.72		16.55		3.99			-0.78375	1.7216		1.46527
	21.23		16.79		4.5			-0.27375	1.20895
	21.12		16.6		4.39			-0.38375	1.30473		1.19715
	21.38		16.69		4.65			-0.12375	1.08956
	20.54		16.85		3.81			-0.96375	1.95037		1.85407
	20.69		16.64		3.96			-0.81375	1.75777
	Test	Average	Reference	Average	Ct1-Ct2	Ct3-Ct4	Average	△Ct	Folds	Average
C THBS-1	21.46	21.33	16.08	16.5475		4.9125	4.7825		1.00609	1	1.00914
	21.59		16.67			5.0425			1.01219
	21.41		16.77			4.8625			1.00375		0.994843
	21.03		16.06			4.4825			0.985935
	21.18		16.7			4.6325			0.992968		0.986639
	20.91		16.82			4.3625			0.980309
	21.56		16.86			5.0125			1.01078		1.00938
	21.5		16.42			4.9525			1.00797
E THBS-1	20.66	20.7888	16.73	16.73	3.93			-0.8525	1.80563	1.70205	1.35736
	21.65		16.99		4.92			0.1375	0.909093
	20.61		16.55		3.88			-0.9025	1.8693		1.90899
	20.55		16.79		3.82			-0.9625	1.94868
	20.66		16.6		3.93			-0.8525	1.80563		1.68876
	20.86		16.69		4.13			-0.6525	1.57189
	20.99		16.85		4.26			-0.5225	1.43644		1.85307
	20.33		16.64		3.6			-1.1825	2.2697
	Test	Average	Reference	Average	Ct1-Ct2	Ct3-Ct4	Average	△Ct	Folds	Average
C COL6A	20.24	20.4875	16.08	16.5475		3.6925	3.94		0.987919	1	0.994509
	20.51		16.67			3.9625			1.0011
	20.09		16.77			3.5425			0.980598		0.983771
	20.22		16.06			3.6725			0.986943
	20.47		16.7			3.9225			0.999146		0.985479
	19.91		16.82			3.3625			0.971812
	21.05		16.86			4.5025			1.02746		1.03624
	21.41		16.42			4.8625			1.04503
E COL6A	19.3	19.4675	16.73	16.73	2.57			-1.37	2.58471	2.30791	2.44105
	19.47		16.99		2.74			-1.2	2.2974
	19.41		16.55		2.68			-1.26	2.39496		2.21144
	19.65		16.79		2.92			-1.02	2.02792
	19.37		16.6		2.64			-1.3	2.46229		2.34843
	19.51		16.69		2.78			-1.16	2.23457
	19.6		16.85		2.87			-1.07	2.09943		2.23071
	19.43		16.64		2.7			-1.24	2.36199
	Test	Average	Reference	Average	Ct1-Ct2	Ct3-Ct4	Average	△Ct	Folds	Average
C LAMC1	19.35	19.4513	16.08	16.5475		2.8025	2.90375		0.994795	1	0.98914
	19.13		16.67			2.5825			0.983484
	19.46		16.77			2.9125			1.00045		0.992738
	19.16		16.06			2.6125			0.985027
	19.46		16.7			2.9125			1.00045		0.995052
	19.25		16.82			2.7025			0.989654
	19.81		16.86			3.2625			1.01844		1.02307
	19.99		16.42			3.4425			1.0277
E LAMC1	19.12	19.0675	16.73	16.73	2.39			-1.55	2.92817	3.12345	2.64508
	19.43		16.99		2.7			-1.24	2.36199
	18.77		16.55		2.04			-1.9	3.73213		3.66857
	18.82		16.79		2.09			-1.85	3.605
	19.79		16.6		3.06			-0.88	1.84038		2.39446
	19.11		16.69		2.38			-1.56	2.94854
	18.71		16.85		1.98			-1.96	3.89062		3.78569
	18.79		16.64		2.06			-1.88	3.68075
